# Supplementary material for: The Efficacy of Chinese Herbal Medicine in Animal Models of Polycystic Ovary Syndrome: A Systematic Review and Meta-Analysis
Source: Hindawi journal article supplement (doi:10.1155/2022/4892215), 2022-08-13

## **SUPPLEMENTAL MATERIAL**

**Title:** The Efficacy of Chinese Herbal Medicine in Animal Models of Polycystic Ovary Syndrome: A Systematic Review and Meta-Analysis

**Authors:** Jiangcheng Zhang, Xiyan Xin, Haolin Zhang, Yutian Zhu, Yang Ye, Dong Li

**Affiliation:** Department of Traditional Chinese Medicine, Peking University Third Hospital, 38 Xueyuan Road, Beijing 100191, China

## Supplementary File 1. Search strategy

### 1. Search strategy used in PubMed database.

#1. rat[Title/Abstract] OR rats[Title/Abstract] OR mouse[Title/Abstract] OR mice[Title/Abstract] OR animal[Title/Abstract] OR animals[Title/Abstract] Items found: 3410081

#2. polycystic ovarian syndrome[Title/Abstract] OR polycystic ovary syndrome[Title/Abstract] OR polycystic ovary[Title/Abstract] OR pcos[Title/Abstract] Items found: 18495

#3. TCM[Title/Abstract] OR herbal medicine[Title/Abstract] OR herb[Title/Abstract] OR formula[Title/Abstract] OR decoction[Title/Abstract] OR chinese[Title/Abstract] OR pill[Title/Abstract] OR tang[Title/Abstract] OR granule[Title/Abstract] Items found: 420728

#4. #1 AND #2 AND #3 Items found: 66

### 2. Search strategy used in Web of Science database

#1. TS=(polycystic ovarian syndrome OR polycystic ovary syndrome OR polycystic ovary OR pcos) Items found: 39588

#2. TS=(rat OR rats OR mouse OR mice OR animal OR animals) Items found: 23088465

#3. TS=(TCM OR herbal medicine OR herb OR formula OR decoction OR chinese OR pill OR tang OR granule) Items found: 3337417

#4. #1 AND #2 AND #3 Items found: 1069

### 3. Search strategy used in Scopus

#1. TITLE-ABS-KEY ( rat OR rats OR mouse OR mice OR animal OR animals ) Items found: 8304654

#2. TITLE-ABS-KEY ( polycystic AND ovarian AND syndrome OR polycystic AND ovary AND syndrome OR polycystic AND ovary OR pcos ) Items found: 11507

#3. TITLE-ABS-KEY ( tcm OR herbal AND medicine OR herb OR formula OR decoction OR chinese OR pill OR tang OR granule ) Items found: 106434

#4. #1 AND #2 AND #3 Items found: 43

**Supplementary Table 1. Study quality score report**

| Author     | Year | (1) | (2) | (3) | (4) | (5) | (6) | (7) | (8) | (9) | (10) | Aggregate<br>quality<br>score |
|------------|------|-----|-----|-----|-----|-----|-----|-----|-----|-----|------|-------------------------------|
| Pan        | 2021 | 1   | 1   | 0   | 1   | 0   | 1   | 1   | 1   | 1   | 1    | 8                             |
| Jiang      | 2021 | 1   | 0   | 1   | 1   | 0   | 1   | 1   | 0   | 1   | 1    | 7                             |
| Chang      | 2021 | 1   | 1   | 1   | 0   | 0   | 1   | 1   | 0   | 1   | 1    | 7                             |
| Xu         | 2021 | 1   | 1   | 0   | 0   | 0   | 1   | 1   | 0   | 1   | 1    | 6                             |
| Liu        | 2021 | 1   | 1   | 1   | 0   | 0   | 1   | 0   | 0   | 1   | 1    | 6                             |
| Wang       | 2020 | 1   | 1   | 1   | 1   | 0   | 1   | 1   | 0   | 1   | 1    | 8                             |
| Xu         | 2021 | 1   | 1   | 0   | 1   | 0   | 0   | 1   | 1   | 1   | 1    | 7                             |
| Yi         | 2021 | 1   | 1   | 1   | 0   | 0   | 1   | 0   | 1   | 1   | 1    | 7                             |
| Zhu        | 2020 | 1   | 0   | 1   | 0   | 0   | 1   | 0   | 1   | 1   | 1    | 6                             |
| Lian       | 2020 | 1   | 1   | 1   | 1   | 0   | 1   | 0   | 0   | 1   | 1    | 7                             |
| Qiu        | 2020 | 1   | 1   | 0   | 0   | 0   | 1   | 1   | 1   | 1   | 1    | 7                             |
| Azeemuddin | 2019 | 1   | 1   | 0   | 0   | 0   | 1   | 1   | 1   | 1   | 1    | 7                             |
| Shao       | 2019 | 1   | 1   | 1   | 1   | 0   | 1   | 1   | 0   | 1   | 1    | 8                             |
| Zhao       | 2017 | 1   | 1   | 1   | 0   | 0   | 1   | 0   | 0   | 1   | 1    | 6                             |
| Wang       | 2016 | 1   | 0   | 1   | 1   | 0   | 1   | 0   | 1   | 0   | 0    | 5                             |

- (1) Publication in a peer-reviewed journal
- (2) Control of temperature
- (3) Random allocation to groups
- (4) Assessment of PCOS model establishment
- (5) Blinded assessment of outcome
- (6) Accurate drug production institutions
- (7) Detection of estrous cycles
- (8) The use of co-morbid animals
- (9) Compliance with animal welfare regulations
- (10) Statement of potential conflicts of interest

# Supplementary Fig. 1 Forest plot of the efficacy of CHM on ovarian mass

**A**

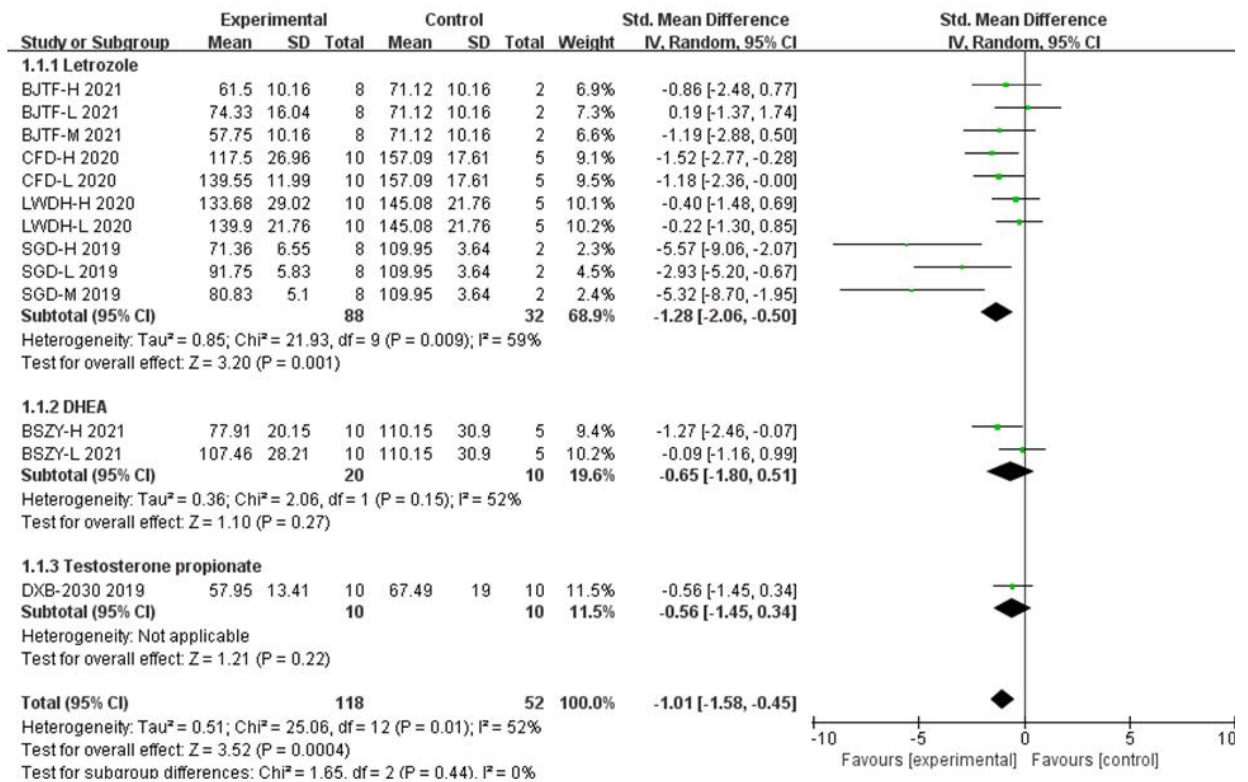

B

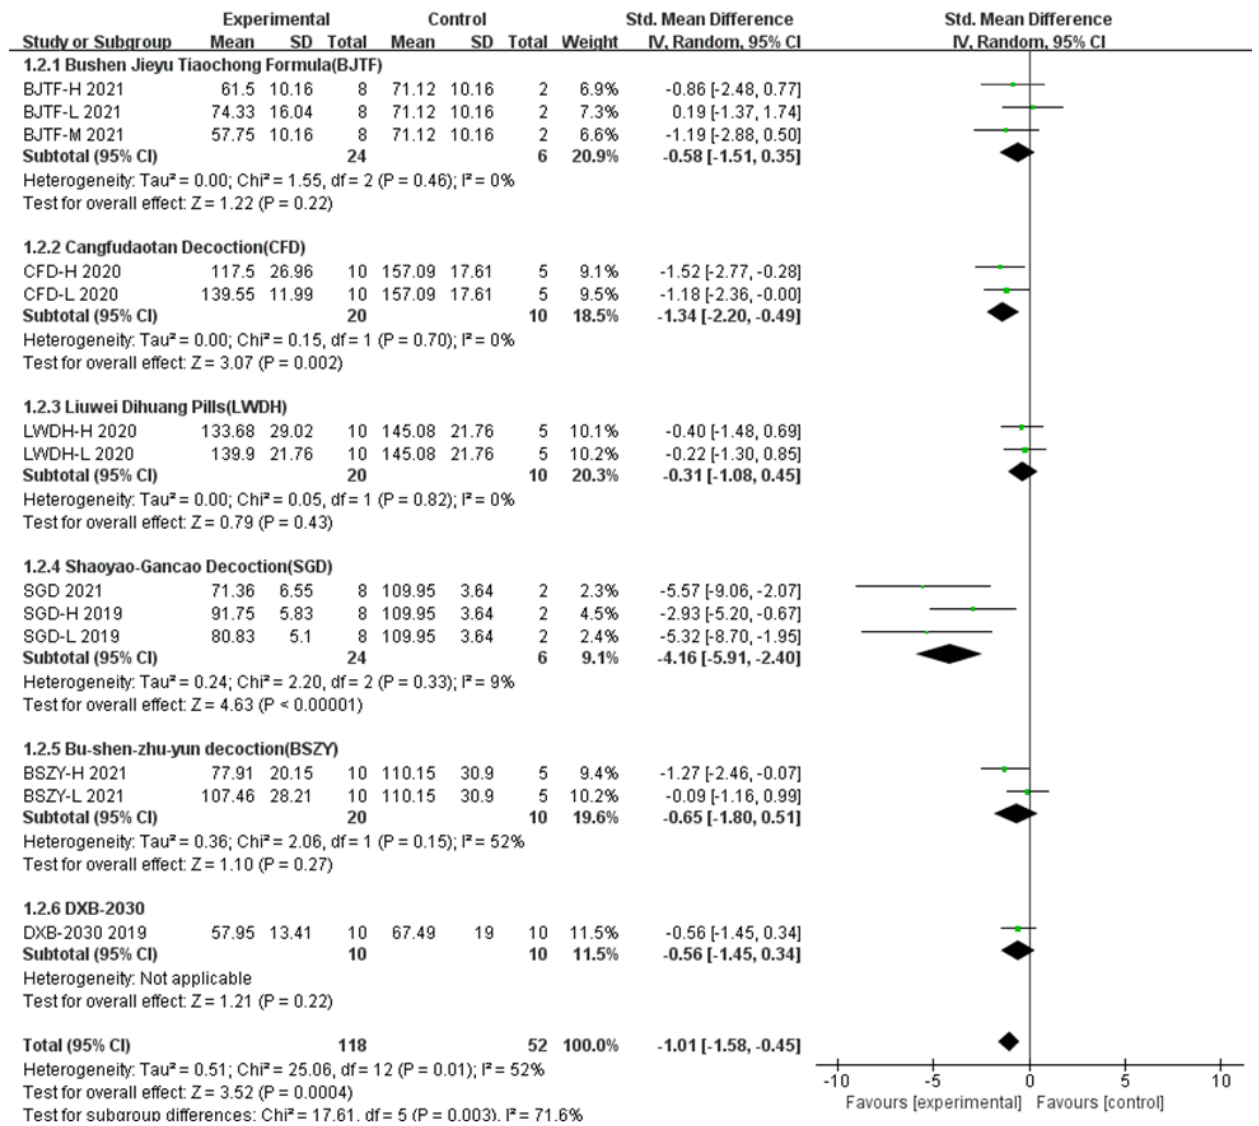

C

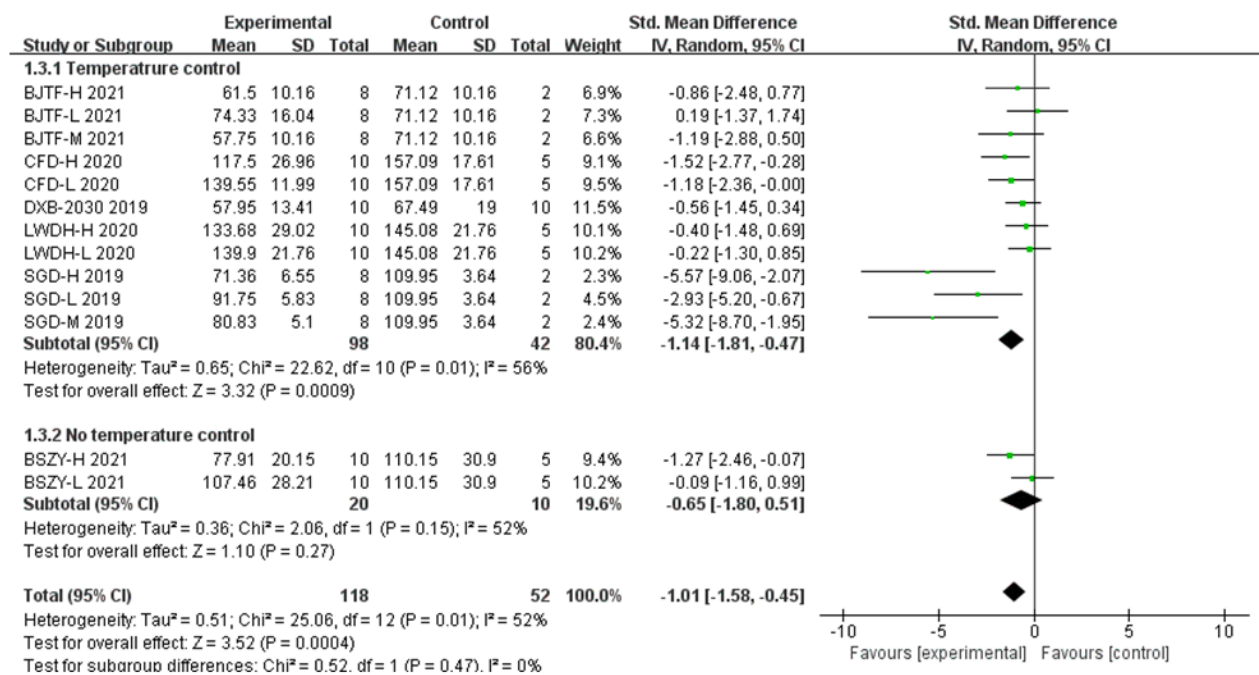

D

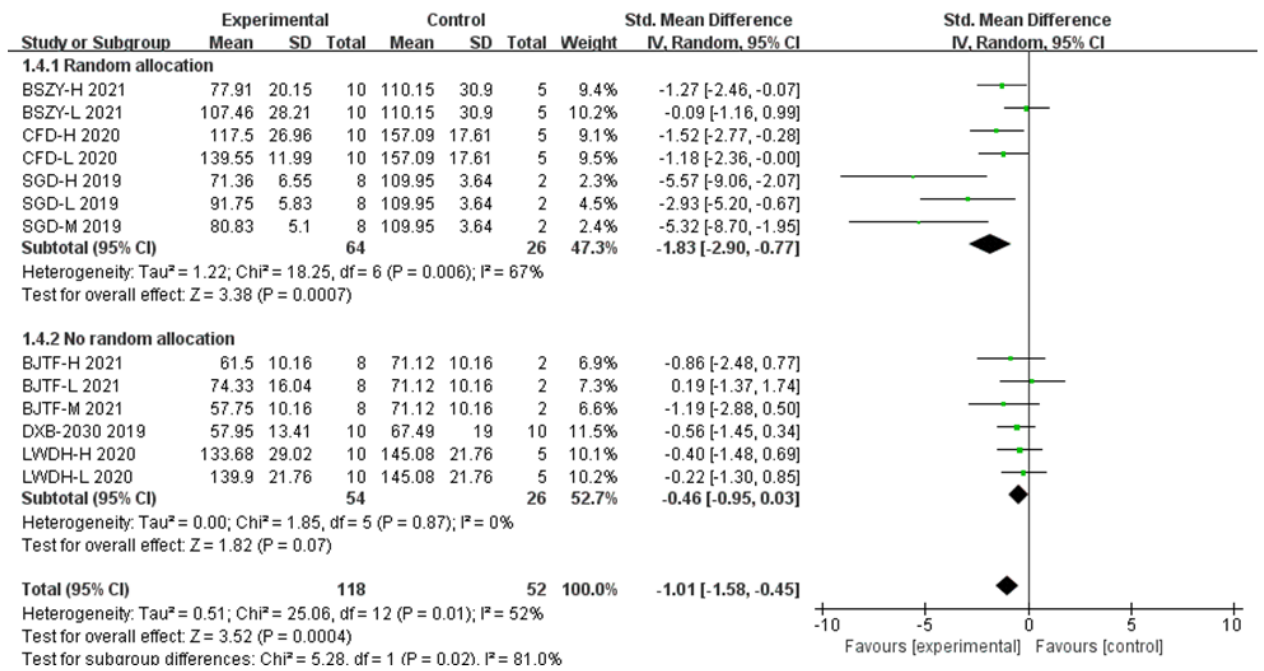

E

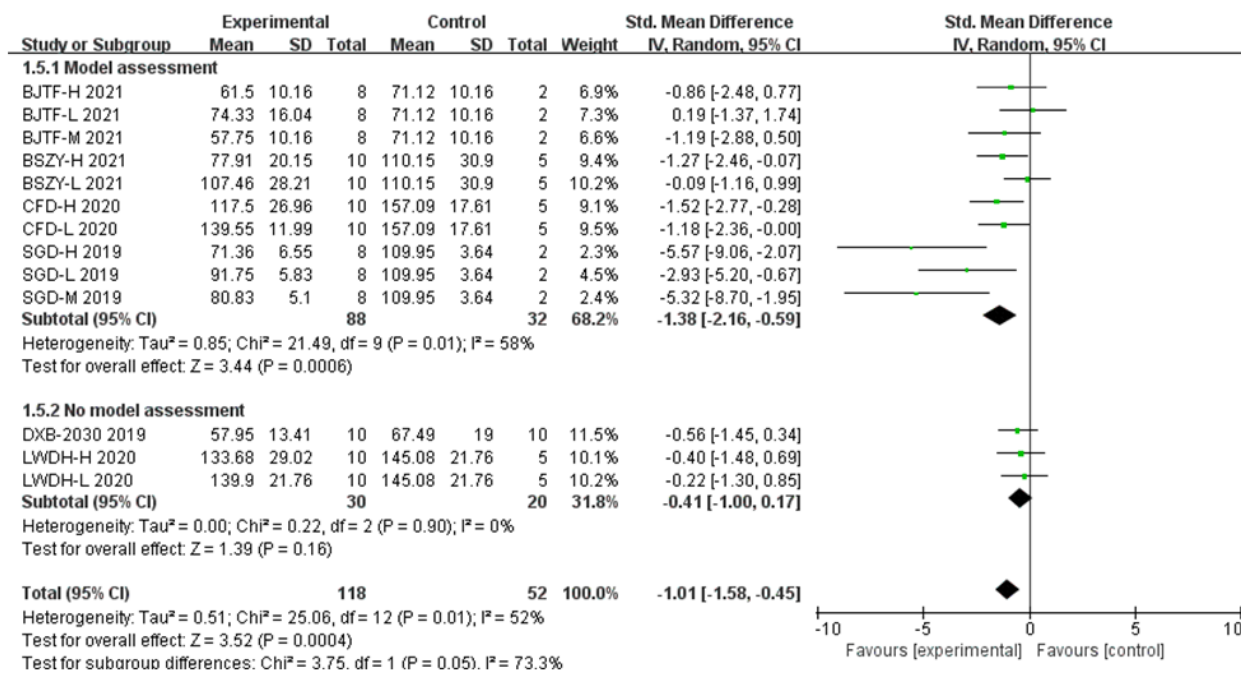

Supplementary Fig. 1 Subgroup analyses were carried out according to (A) PCOS induction drug, (B) formula composition, (C) temperature control, (D) random allocation, and (E) model assessment.

## Supplementary Fig. 2 Forest plot of the efficacy of CHM on testosterone

**A**

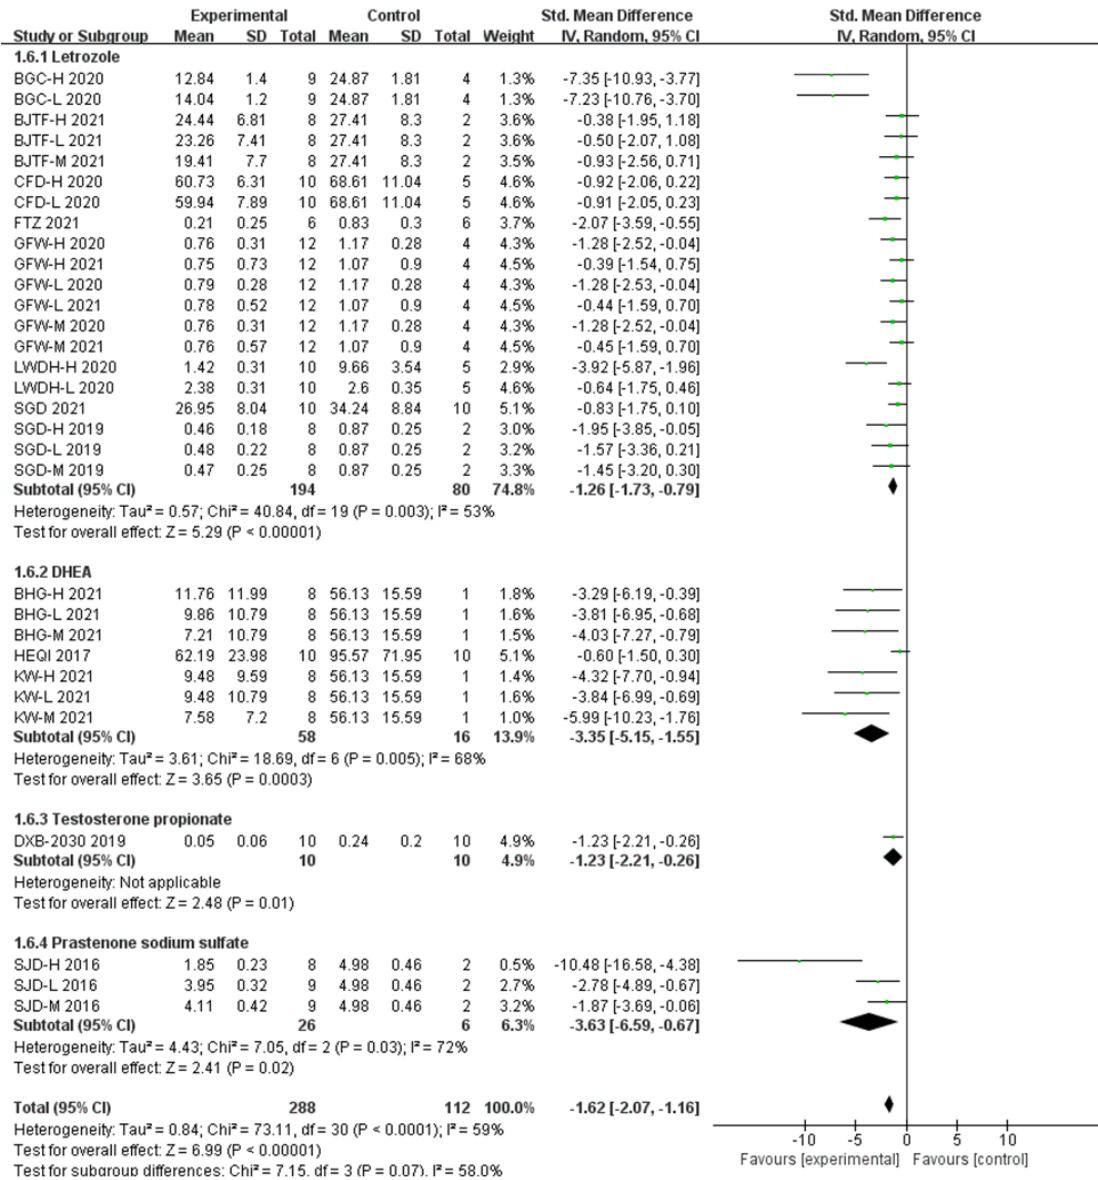



B

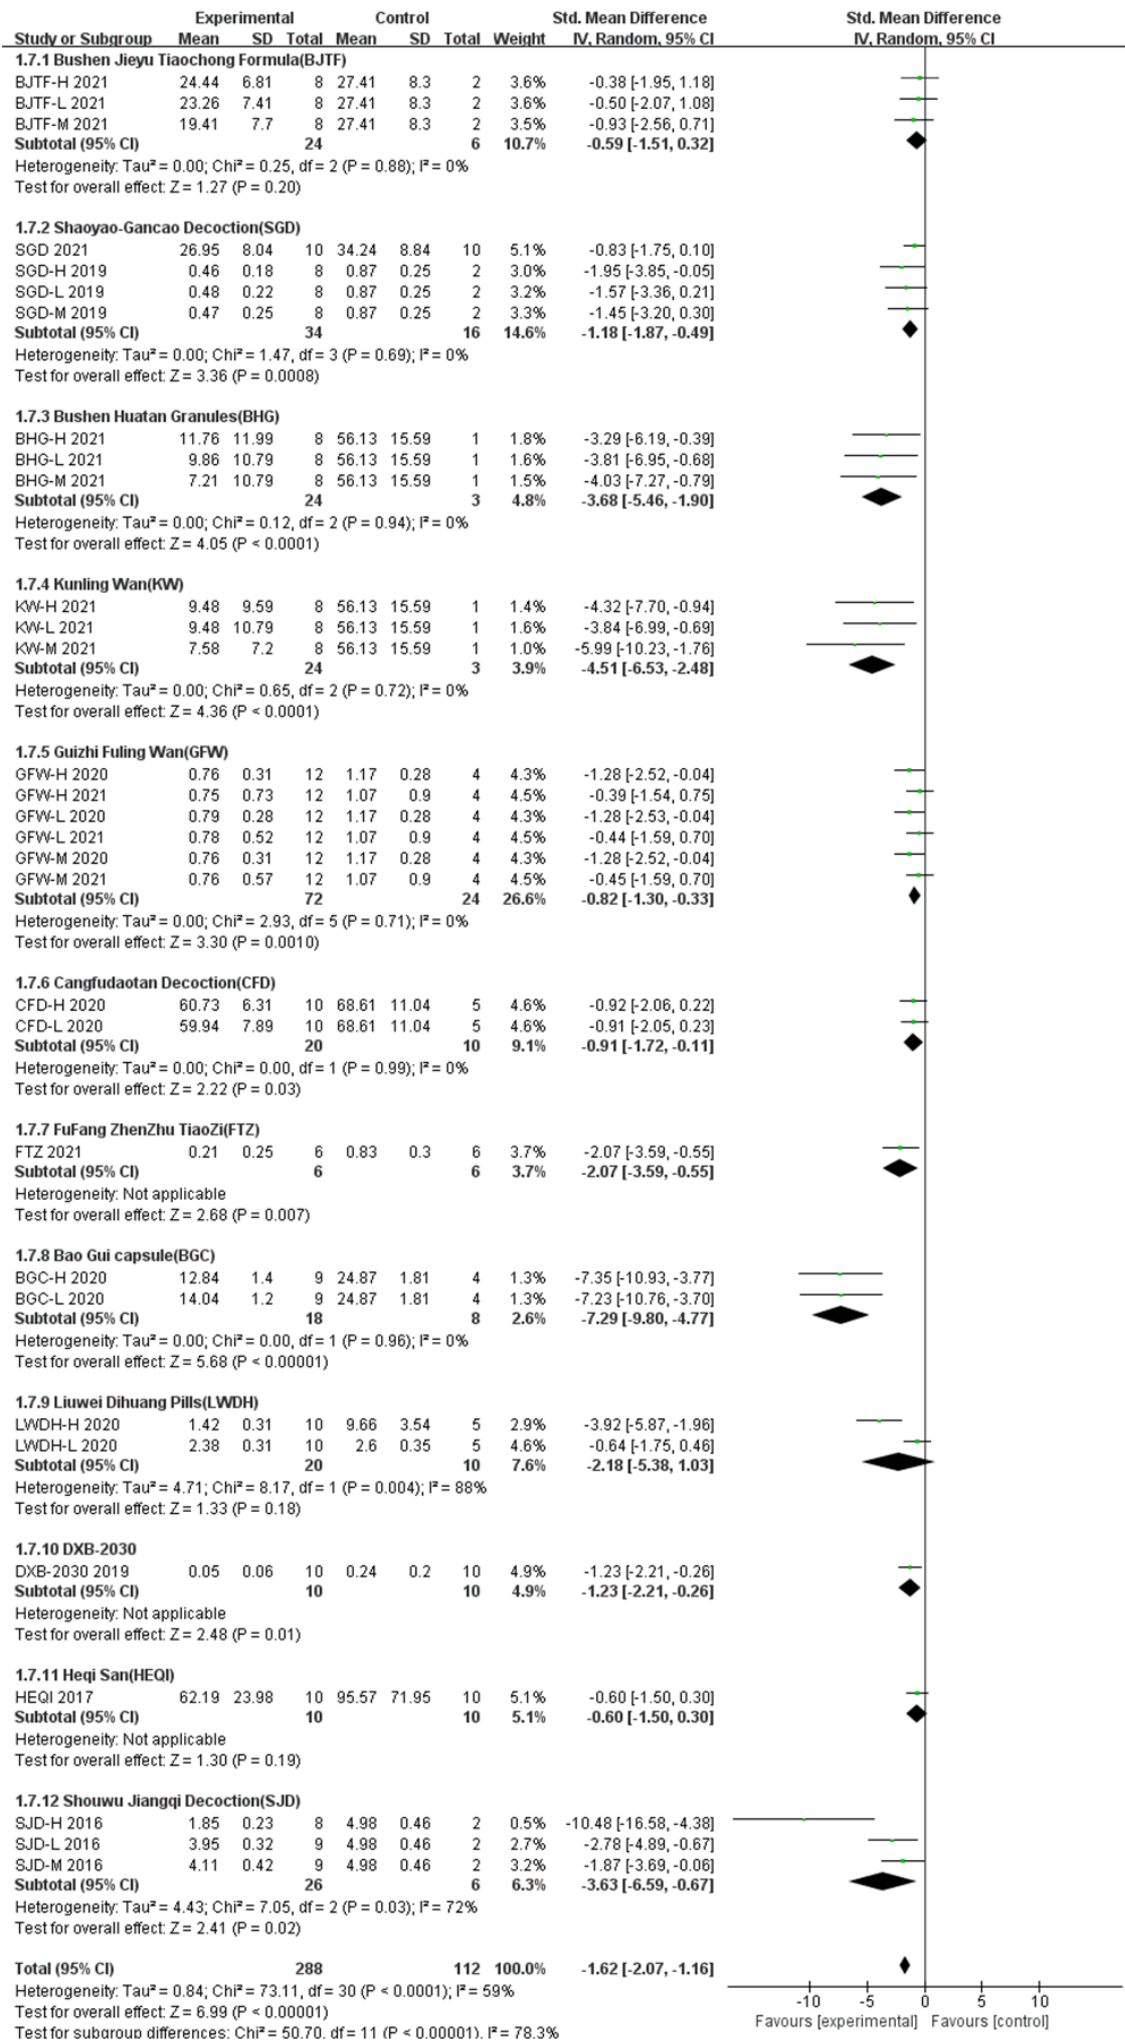



C

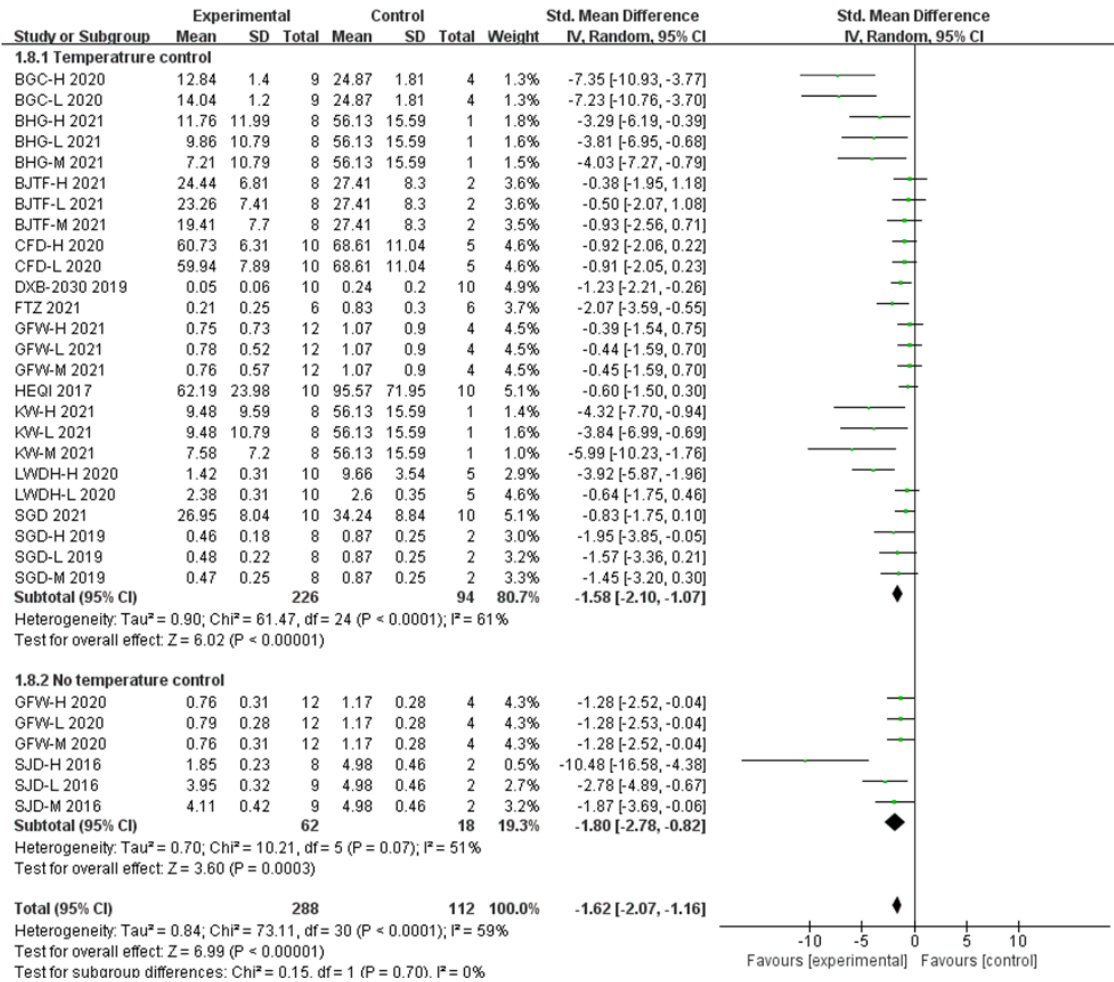

D

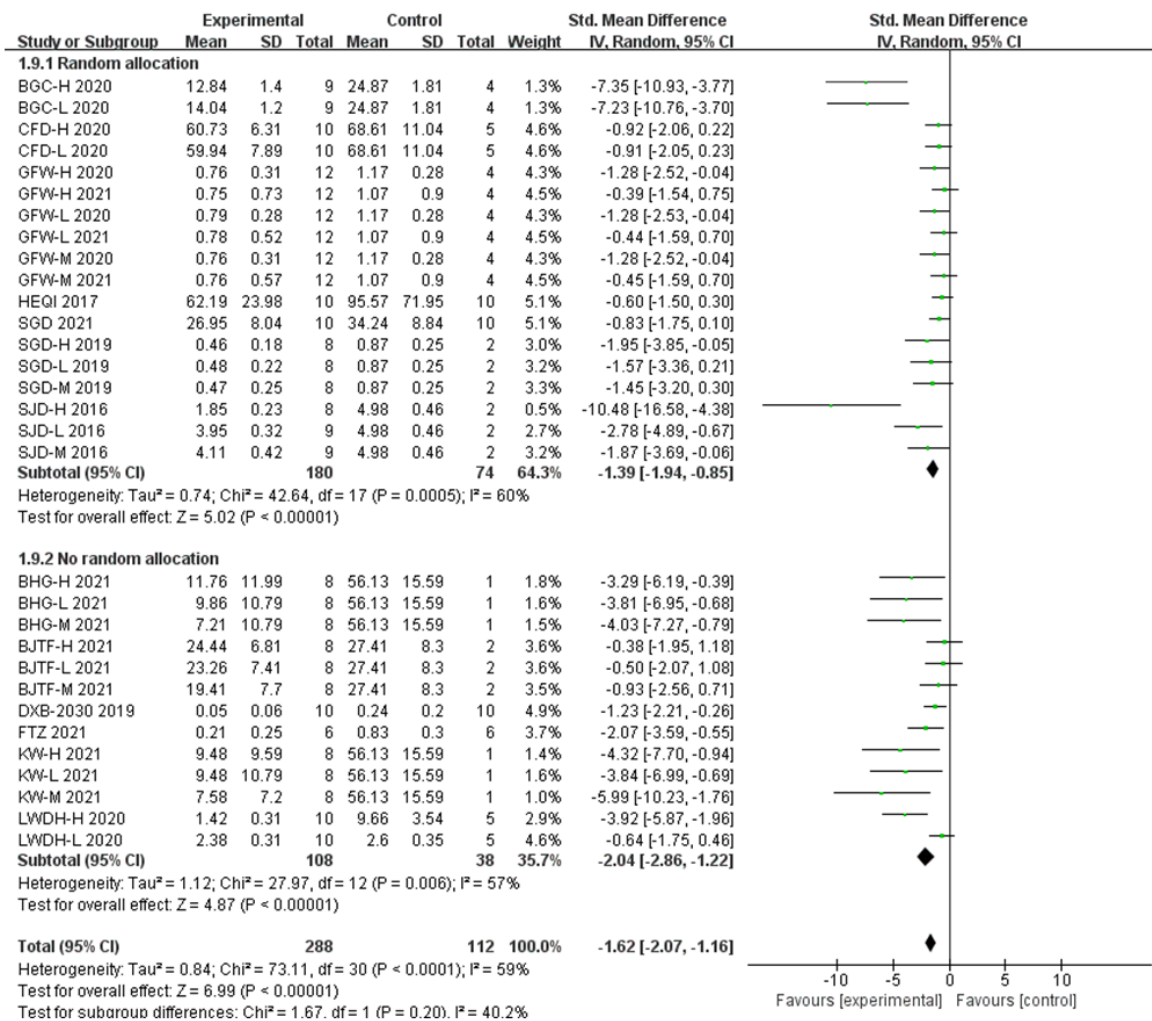

E

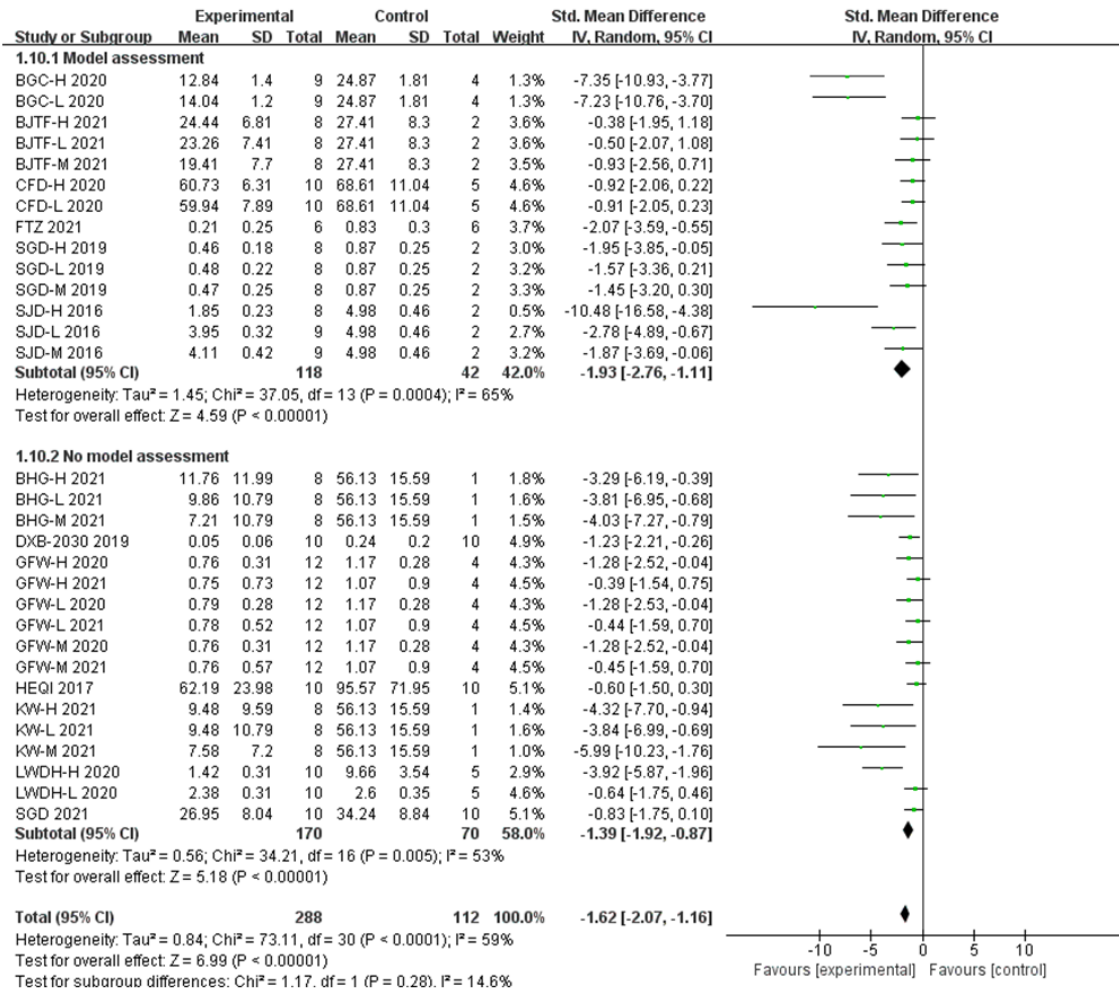

Supplementary Fig. 2 Subgroup analyses were carried out according to (A) PCOS induction drug, (B) formula composition, (C) temperature control, (D) random allocation, and (E) model assessment.

## Supplementary Fig. 3 Forest plots of the efficacy of different formulas.

A

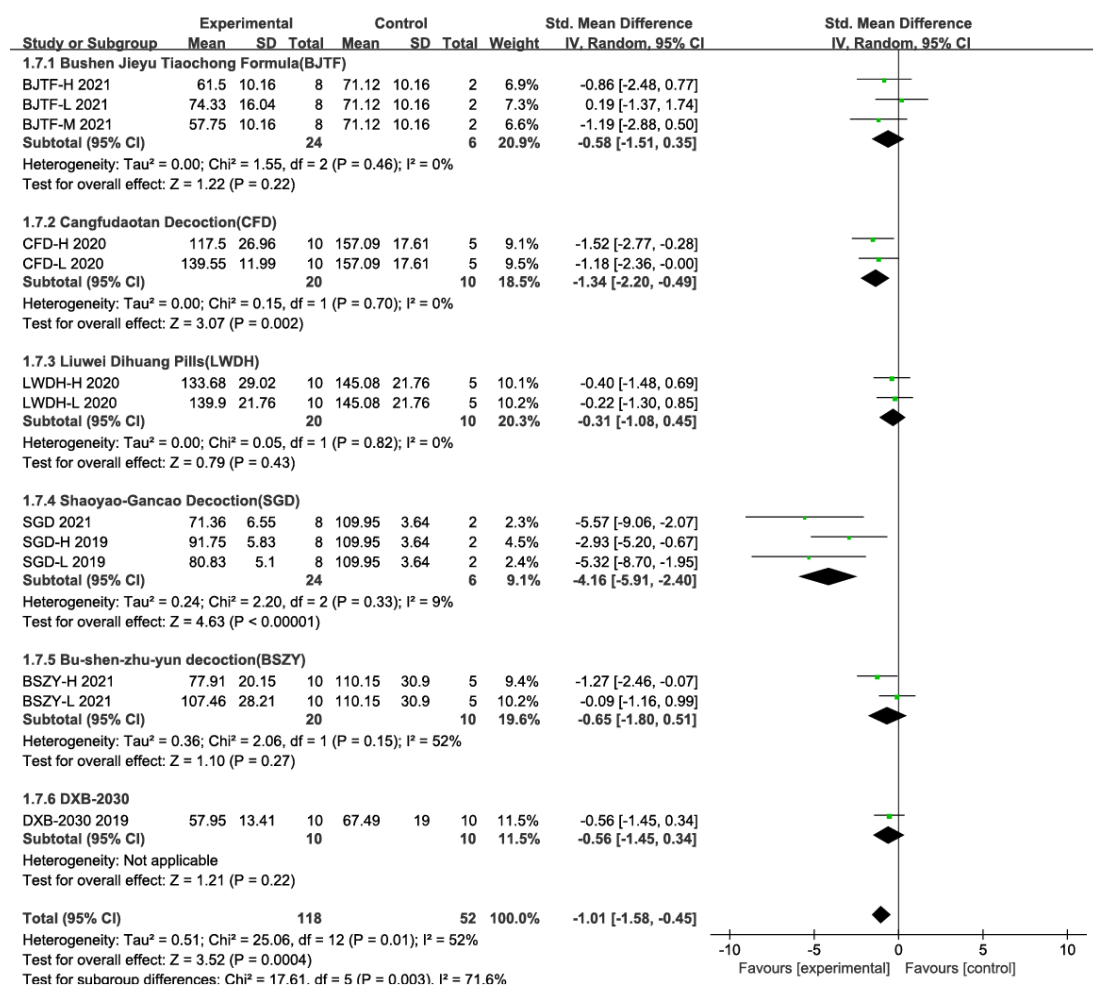

## B

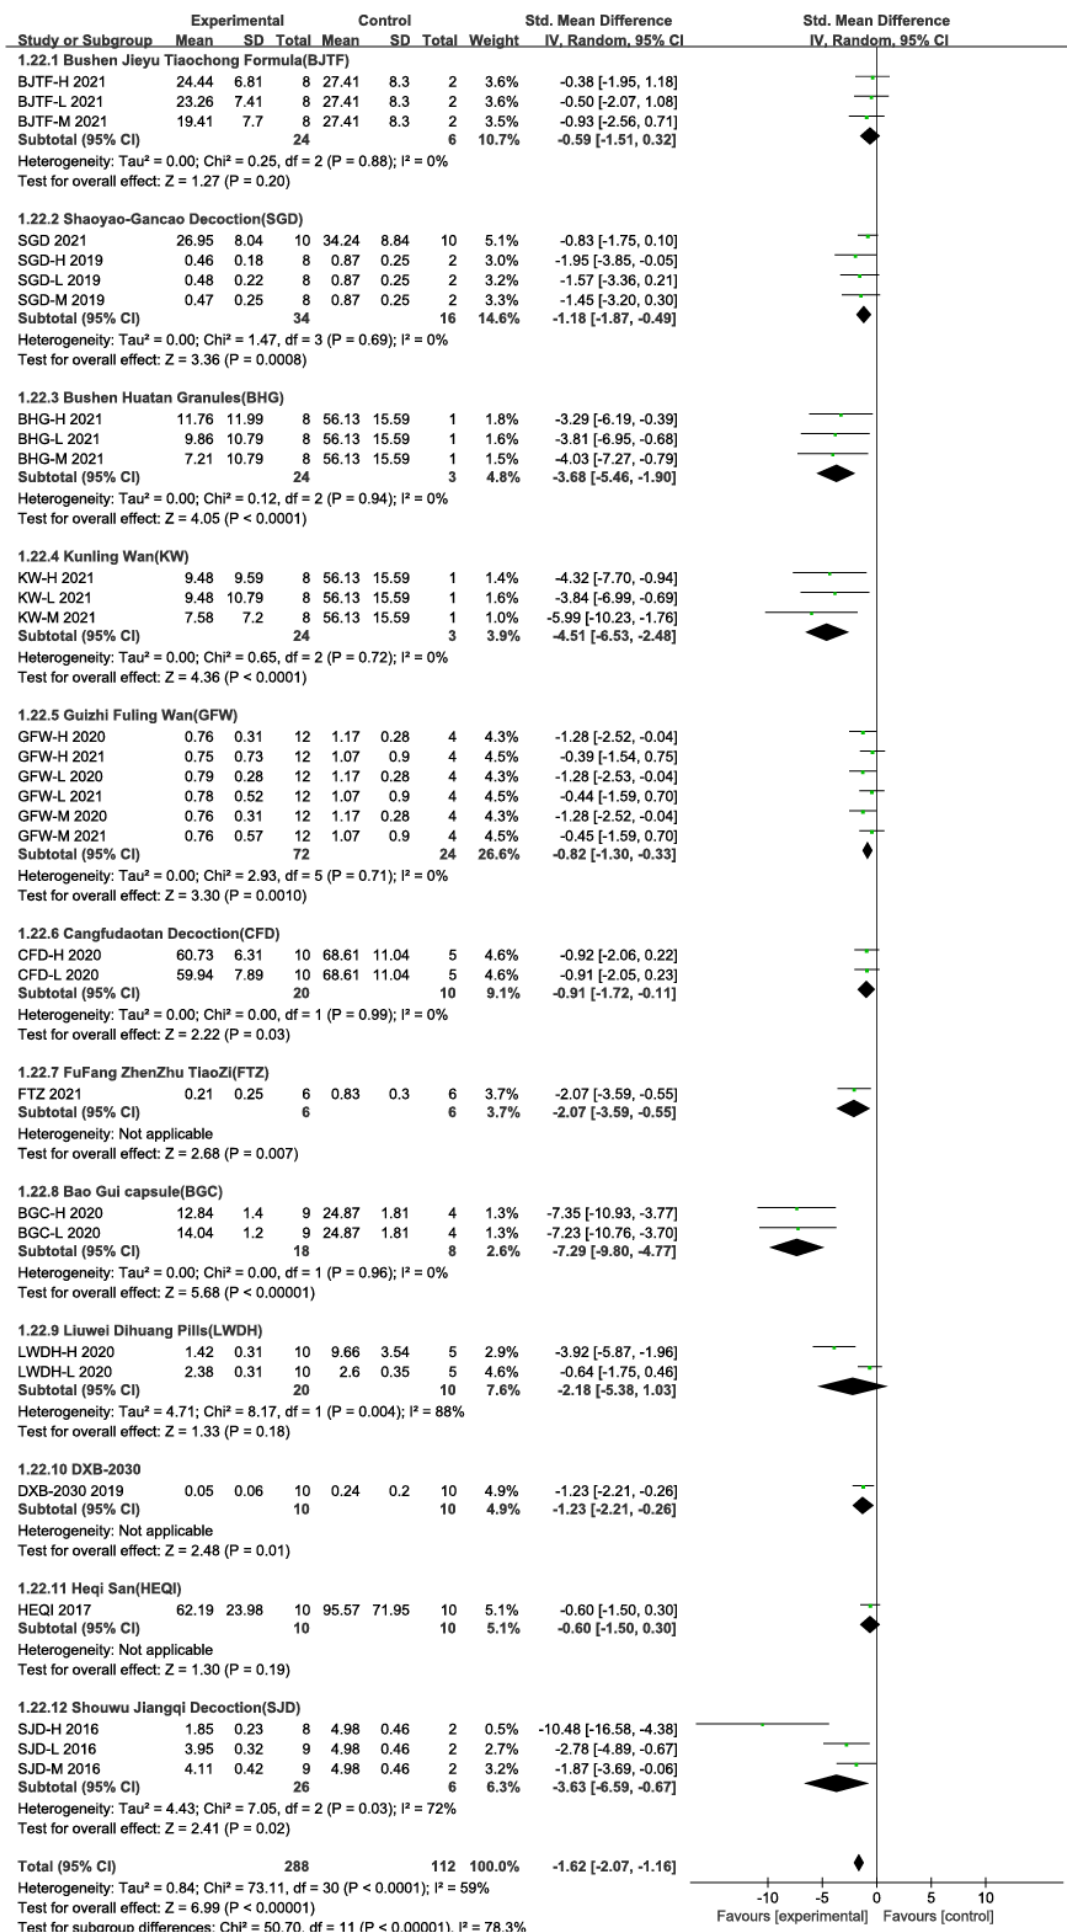

C

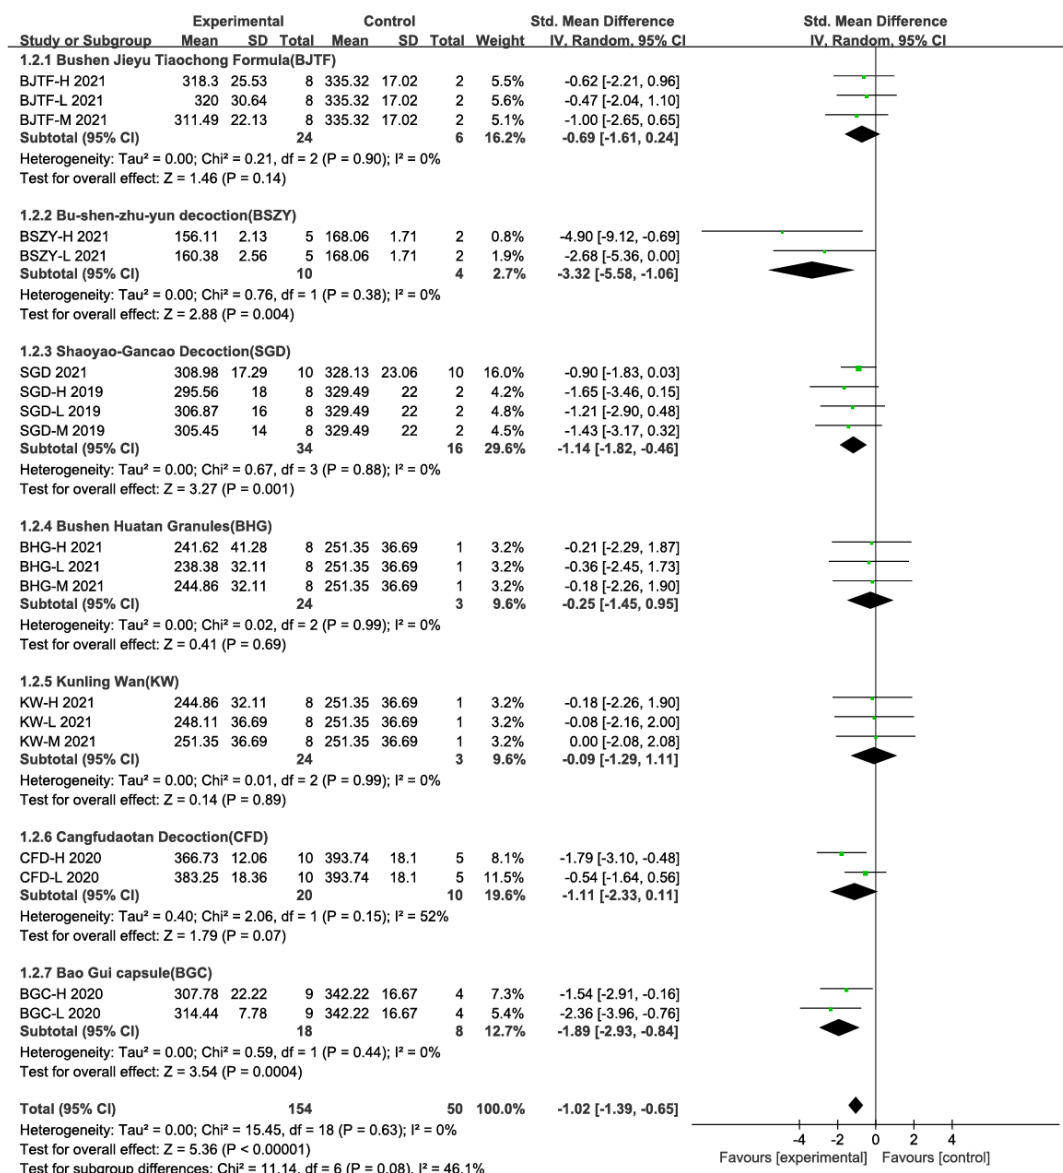

D

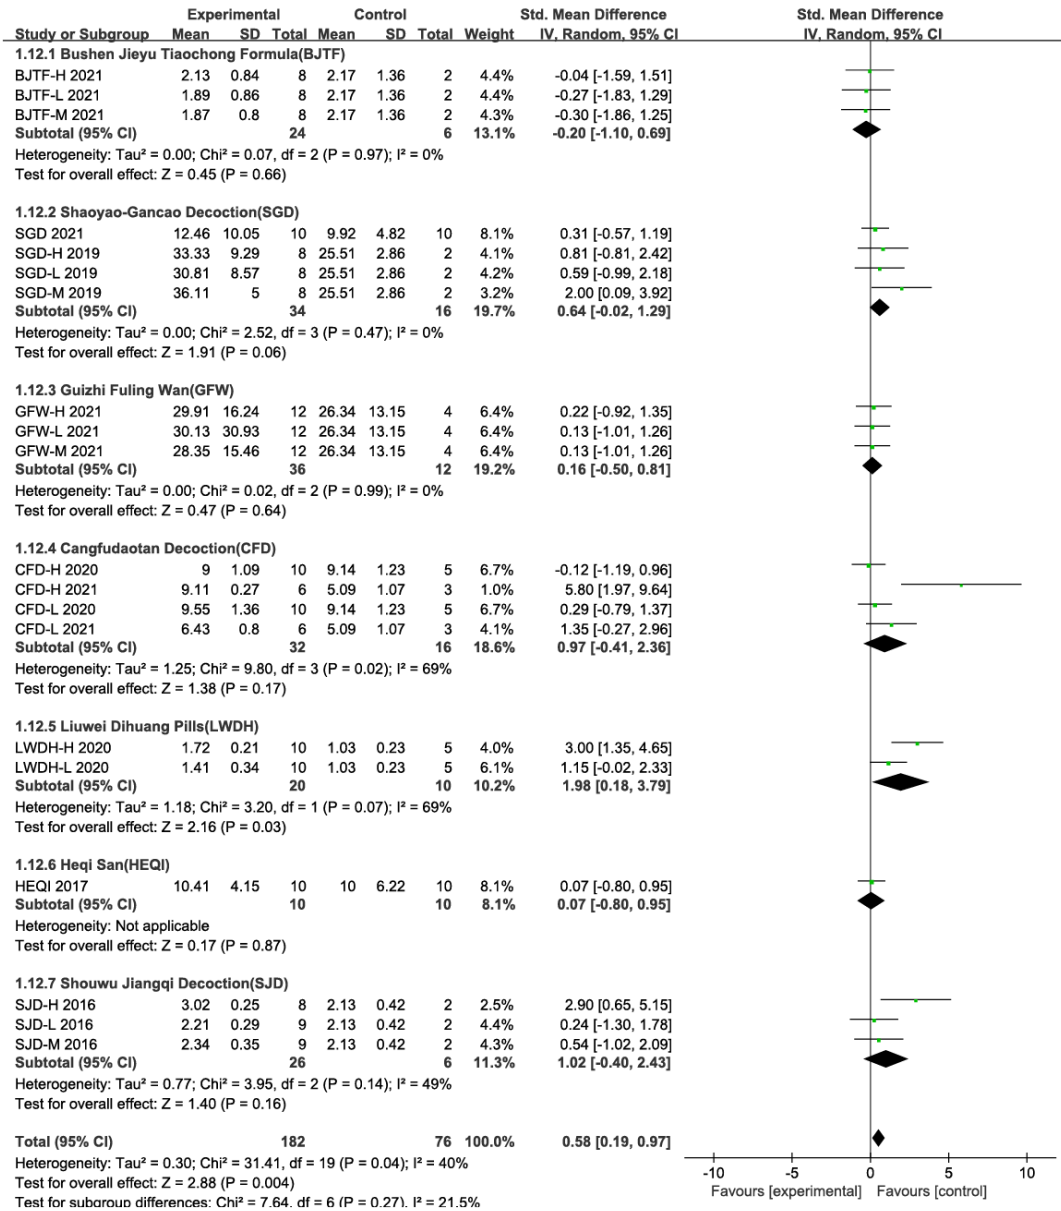



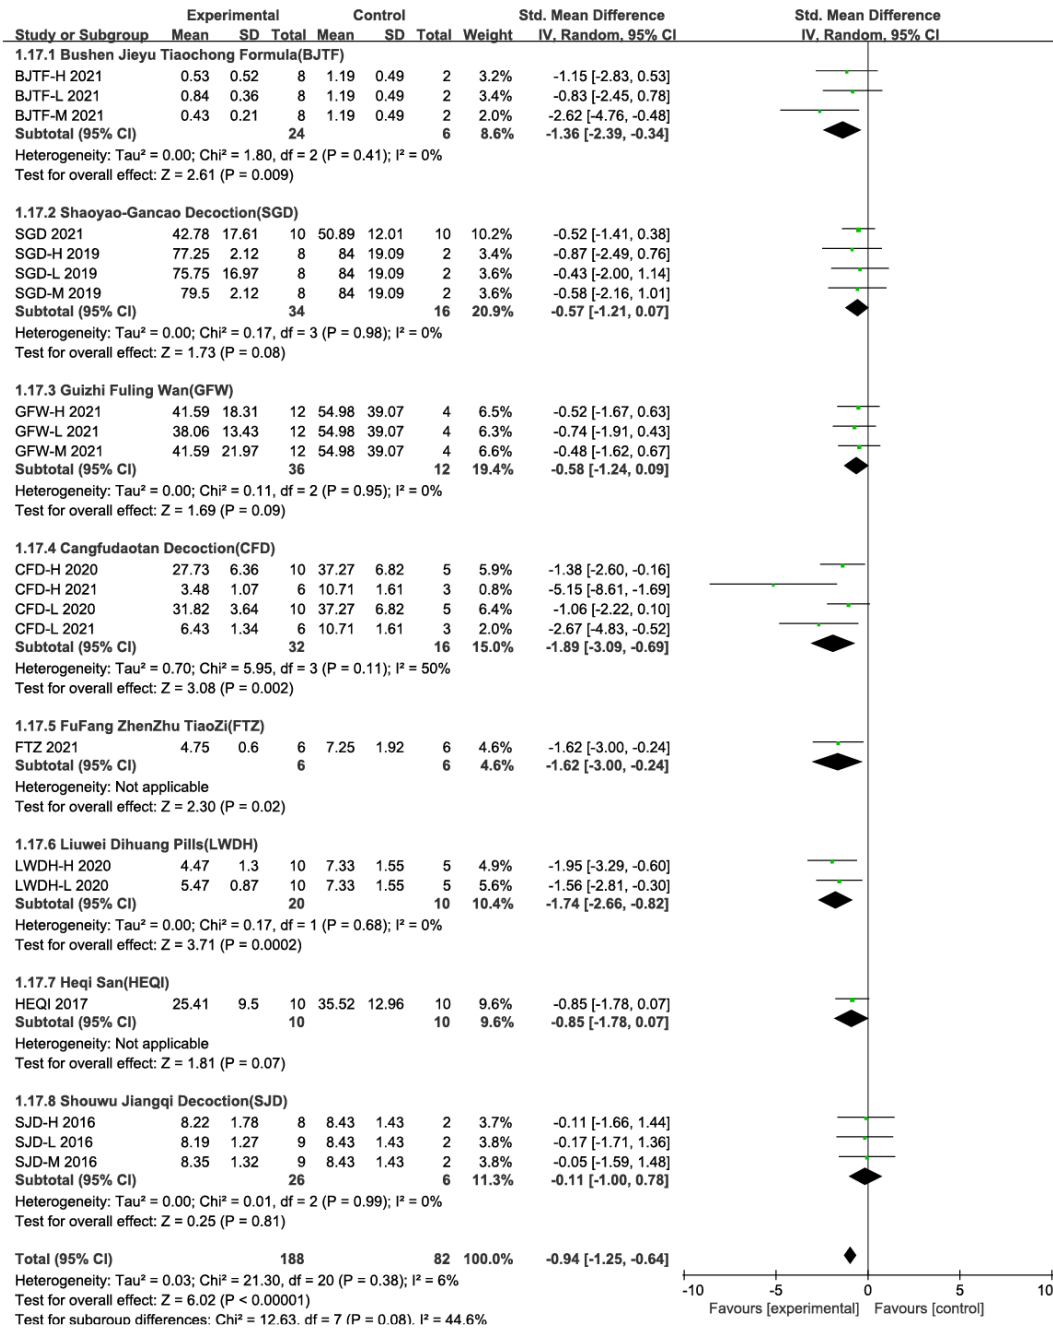

F

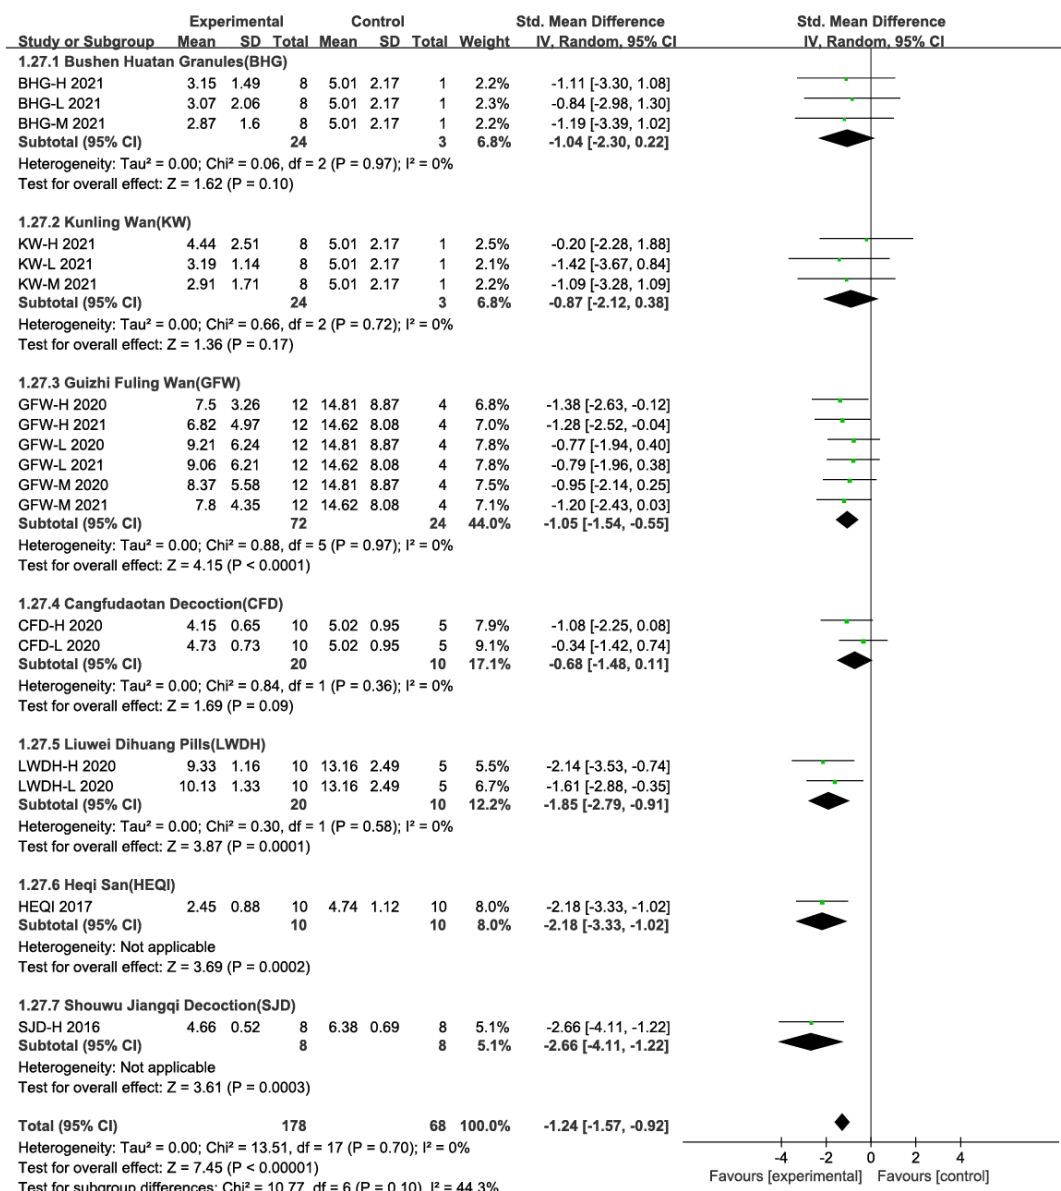

Supplementary Fig. 3 According to different formulas, meta-analysis was conducted for (A) ovarian mass, (B) testosterone, (C) weight, (D) FSH, (E) LH, and (F) HOMA-IR.

## Supplementary Fig. 4 Sensitivity analysis

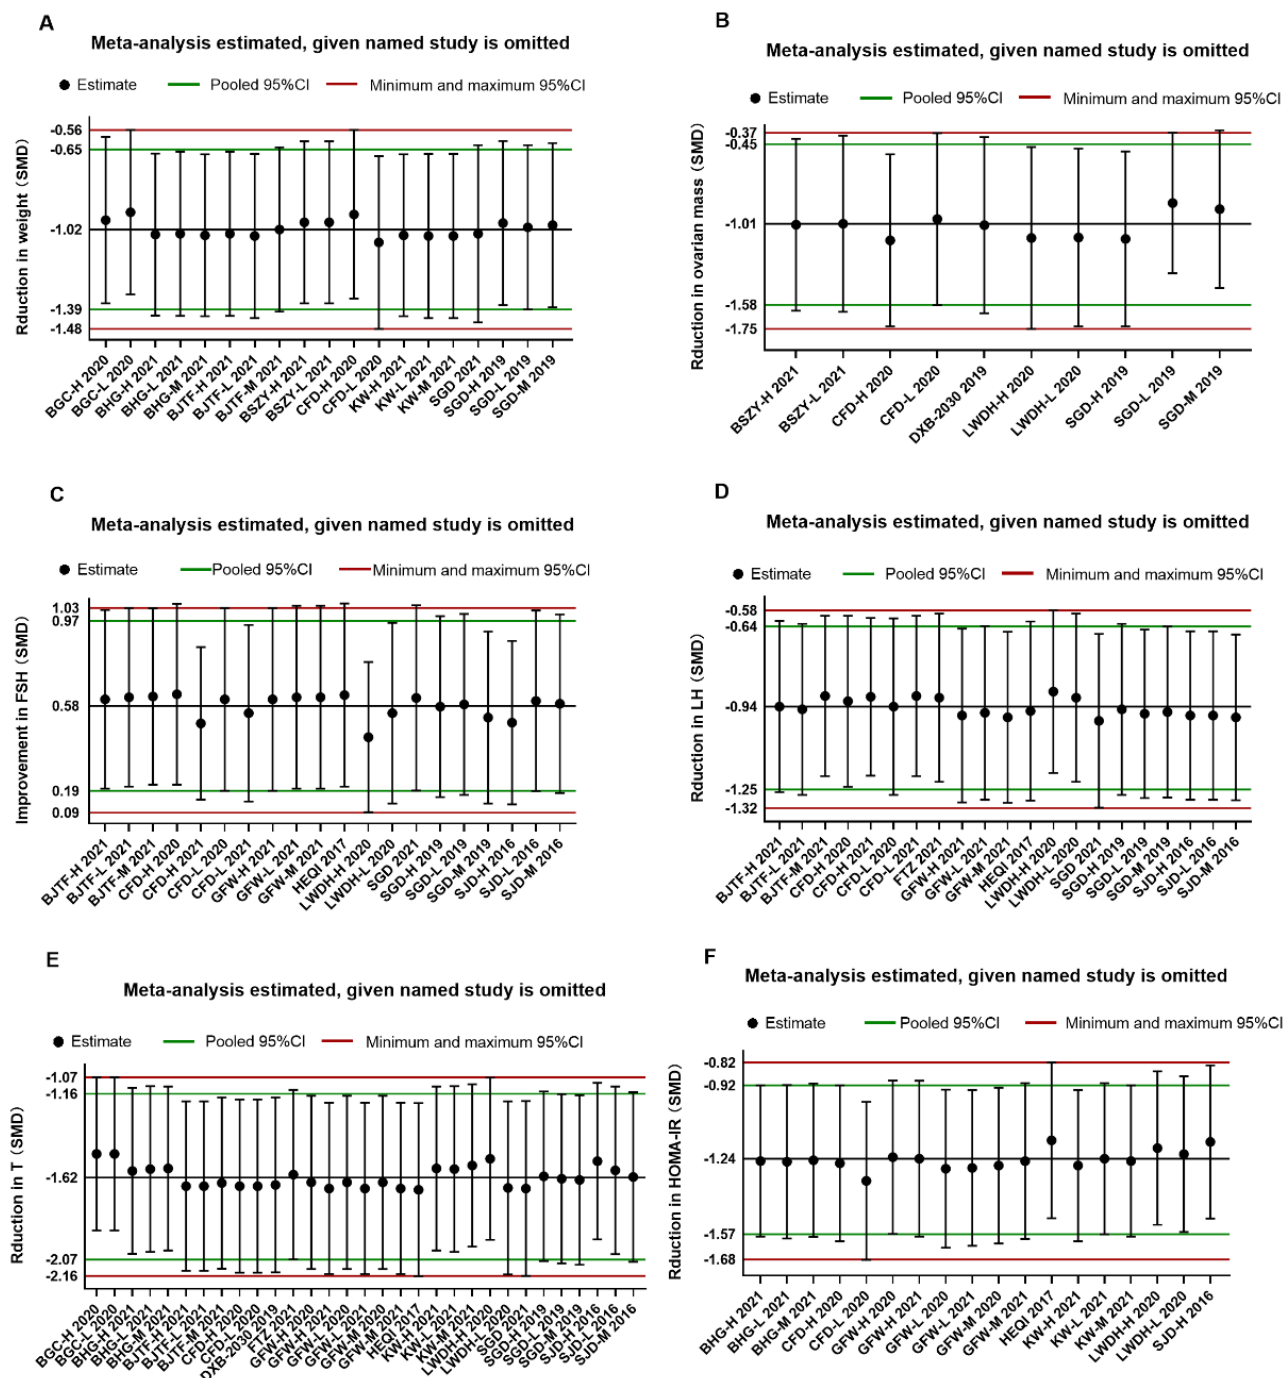

Supplementary Fig. 4 The sensitivity analysis was conducted for (A) weight, (B) ovarian mass, (C) FSH, (D) LH, (E) testosterone, and (F) HOMA-IR.

# Supplementary Fig. 5 Forest plots of weight improvement by different PCOS induction drugs

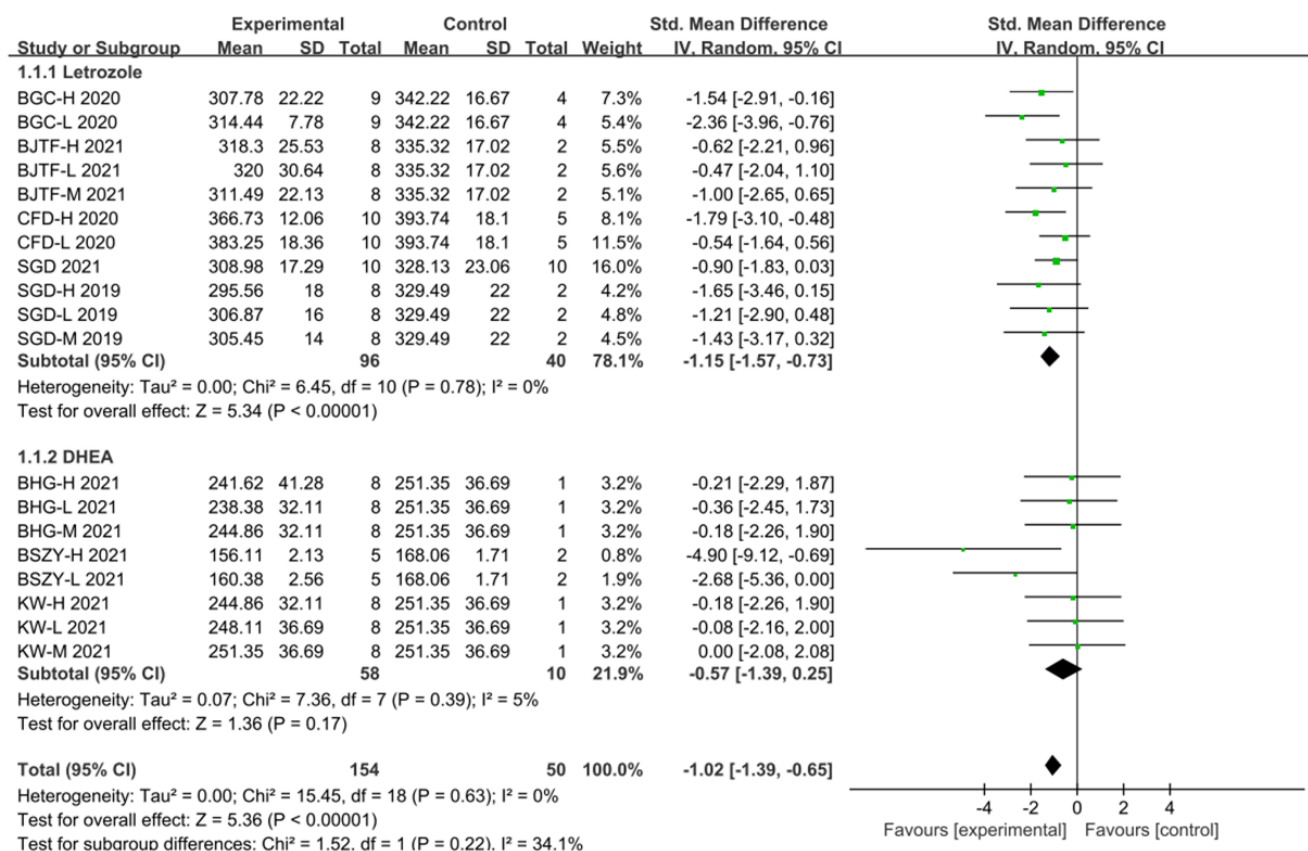

Supplement: f1 [file 4892215.f1.zip]
