# Supplementary material for: The Efficacy of Chinese Herbal Medicine in Animal Models of Polycystic Ovary Syndrome: A Systematic Review and Meta-Analysis
Source: Evid Based Complement Alternat Med. 2022 Aug 13;2022:4892215. doi: 10.1155/2022/4892215 (PMC9392647; doi:10.1155/2022/4892215)
Supplement: Supplementary Materials — Supplementary File 1: Search strategy. Table S1: Study quality score report. Figure S1: Forest plot of the efficacy of CHM on ovarian mass. Figure S2: Forest plot of the efficacy of CHM on testosterone. Figure S3: Forest plots of the efficacy of different formulas. Figure S4: Sensitivity analysis. Figure S5: Forest plots of weight improvement by different PCOS induction drugs. [file 4892215.f1.zip]

Archive with 2 entries (2 files):
- 4892215.f1/PRISMA_2020_checklist.pdf
- 4892215.f1/SUPPLEMENTAL MATERIAL (1).pdf
